# Supplementary material for: A novel anode comprised of C&N co-doped Co3O4 hollow nanofibres with excellent performance for lithium-ion batteries
Source: Royal Society of Chemistry journal article supplement (doi:10.1039/c6cp02660e), 2016-01-01
Supplement: c6cp02660e1.pdf [file c6cp02660e1.pdf]

## Supporting Information for

# Novel anode of C&N co-doped Co<sub>3</sub>O<sub>4</sub> nanofibers with excellent performance for lithium-ion batteries

Chunshuang Yan, Gang chen,\* Jingxue Sun,\* Xin Zhou, Chade Lv

### 2 Experimental Section

#### 2.1 Synthesis of PAN nanofiber:

Poly(acrylonitrile) (PAN) (Mw~89000, 99%), N,N-dimethylformamide (DMF, 99%), and Co(NO<sub>3</sub>)<sub>2</sub>·6H<sub>2</sub>O (97%) were purchased. In a typical process, PAN were dissolved in DMF to harvest homogeneous dispersion at 80 °C for 5 h under magnetic stirring. PAN nanofibers were collected on the alumina foil 10 cm away from a syringe needle linked to a variable high voltage power supply of 12 kV with a feeding rate of 0.3 mL/h.

#### 2.2 Typical synthesis of C&N co-doped Co<sub>3</sub>O<sub>4</sub> hollow nanofibers:

In a typical synthesis, first, PAN nanofibers was obtained similar to previous reports.<sup>1</sup> Then, 0.291 g of Co(NO<sub>3</sub>)<sub>2</sub> was dissolved in alcoholic solution (35 mL) under magnetic stirring for 30 min. The resulting solution was transferred into a 50 mL Teflon-lined autoclave with electrospun PAN nanofibers. The autoclave was sealed and heated at 180°C for 12 h, and cooled naturally to room temperature. The obtained membrane was washed with ethanol, and dried at 80 °C. The dry membrane was first stabilized in an ambient atmosphere at 300 °C for 2 h and then carbonized under ammonia protection at 600 °C.

#### 2.3 Materials Characterizations.

XRD patterns were recorded over a  $2\theta$  range from 10° to 90° at a speed of 10° min<sup>-1</sup> using a Rigaku D/max-2000 diffractometer with Cu-K $\alpha$  radiation. The morphology of the samples was assessed by the scanning electron microscopy (SEM). Transmission electron microscopy (TEM) images of the as-prepared samples were collected by employing an FEI Quanta 200F field emission scanning electron microscope and an FEI Tecnai G2 S-Twin transmission electron microscope, respectively. Raman spectra were recorded on a Renishaw *via* micro-Raman spectroscopy system in the backscattering geometry with a 458 nm argonion laser as the excitation source. The surface analysis was conducted using X-ray photoelectron spectroscopy with an Al K $\alpha$  chromatic X-ray source (1486.60 eV, PHI 5700 ESCA System, USA). The thermal stability

was determined by a SETARAM DSC-141 under a stream of air and a heating rate of 10 K min<sup>-1</sup>.

#### **2.4 Electrochemical Measurements.**

The electrodes were prepared with C&N co-doped Co<sub>3</sub>O<sub>4</sub> nanofibers, carbon black, and poly(vinyl difluoride) (PVDF) at a weight ratio of 80:10:10. The slurry was cast on Cu foil and dried at 120 °C in vacuum for 12 h. The cells were assembled with pure lithium foil (99.9%, Aldrich) as the counter electrode, Celgard 2400 film as the separator, and 1 M LiPF<sub>6</sub> EC:DMC (1:1) electrolyte in an argon-filled glove box. The discharge and charge measurements were carried out on a NEWARE BTS-610 (Neware Co., Ltd, China) battery tester. All the tests were performed in the range between 0.01 V and 3 V.

#### **2.5 Computational Details**

The calculations were performed using the Vienna Ab Initio Simulation Package (VASP).<sup>1</sup> All our calculations are based on DFT within spin-unrestricted PBE approximation to the exchange-correlation energy.<sup>2</sup> Both atomic positions and cell parameters were optimized with the conjugate gradient algorithm until the residual forces were converged to less than 0.03 eV/Å and 1×10<sup>-5</sup> eV. A 10×10×10 *k*-point for optimization and 25×25×25 *k*-point for the subsequent electronic properties sampling in reciprocal space and a plane-wave basis set with an energy cutoff of 500 eV were used.

Co<sub>3</sub>O<sub>4</sub> is a highly correlated insulator, an obvious underestimated band gap was obtained because the conventional PBE functional failed to describe the strong correlation effects between the d electrons, thus GGA+U method was imperative. In the PBE+U<sub>eff</sub> calculation, the effective on-site Coulomb interaction U<sub>eff</sub>=2 for the Co<sup>2+</sup> ions and Co<sup>3+</sup> ions was used to obtain the correct band gap, in which U<sub>eff</sub>=U-J, U=2.2 and J=0.2. Similar dispersion trend in conduction and valence bands to those calculated by HSE06 method<sup>3</sup> guaranteed the rationality of our results.

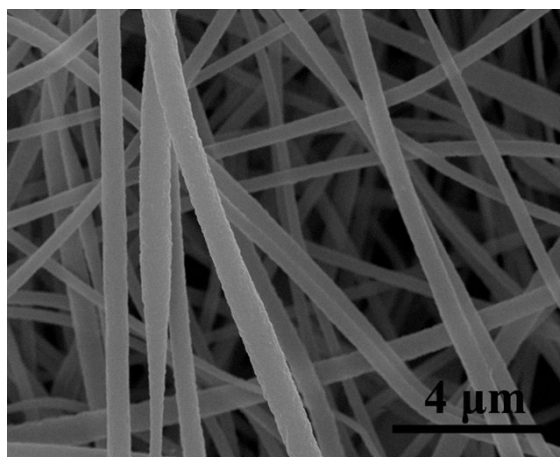

Fig. S1 SEM images of the bare PAN NFs.

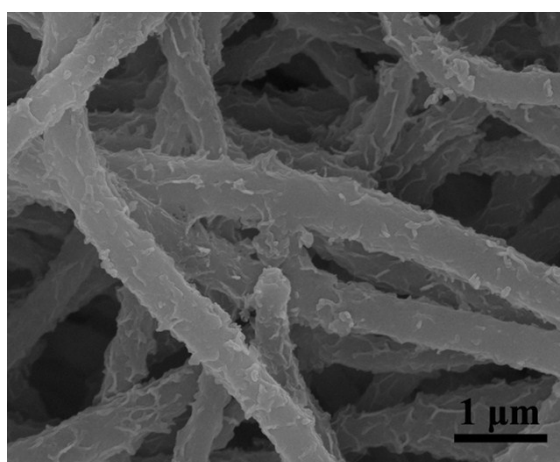

Fig. S2 SEM images of the prepared precursor in alcoholic  $\text{Co}(\text{NO}_3)_2$  solution.

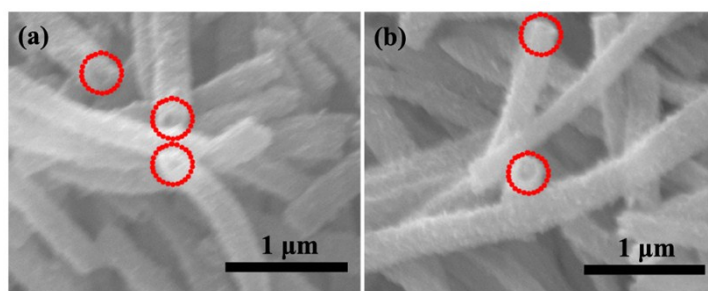

Fig. S3 SEM images of the obtained  $\text{Co}_3\text{O}_4$  NFs by calcinating in air at 300 °C.

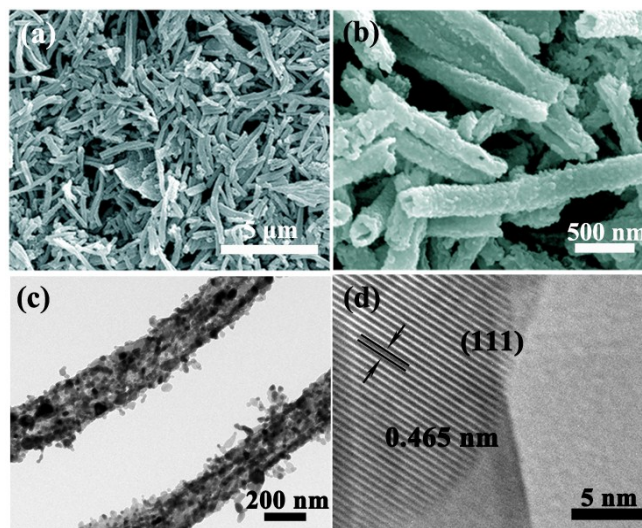

Fig. S4 Microstructure analysis of the as-prepared un-HNFs (a, b) SEM and (c, d) TEM and HRTEM images.

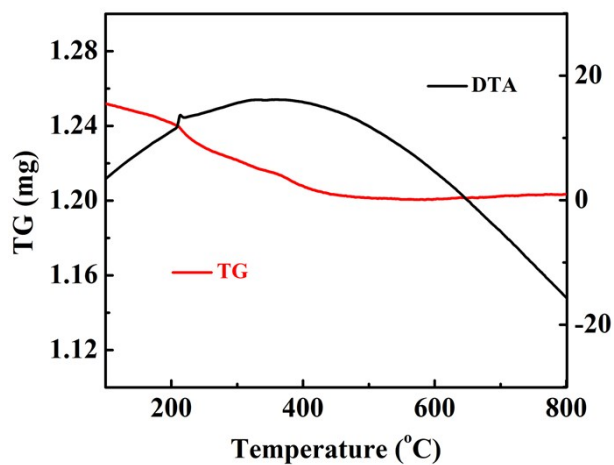

Fig. S5 TG-DTA analysis of the undoped  $\text{Co}_3\text{O}_4$  HNFs.

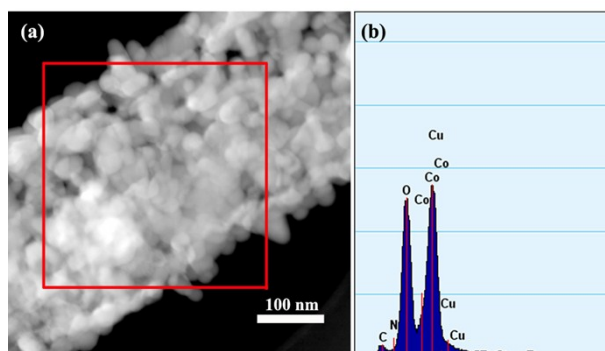

Fig. S6 The energy-dispersive X-ray spectroscopy (EDS) spectrum of C&N-HNFs.

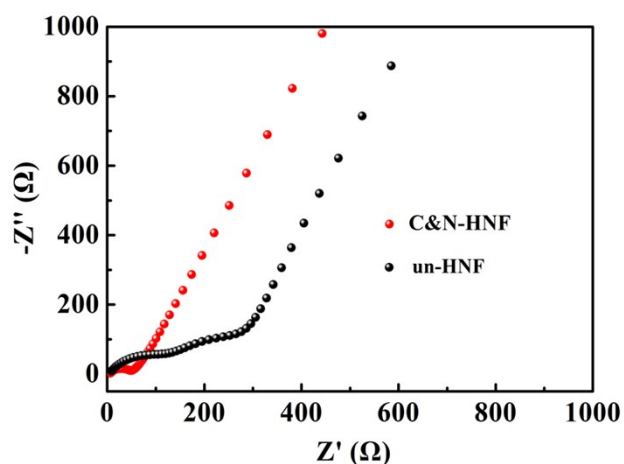

Fig. S7 The electrochemical impedance spectroscopy (EIS) of the un-HNFs and C&N-HNFs electrodes before cycling measurements.

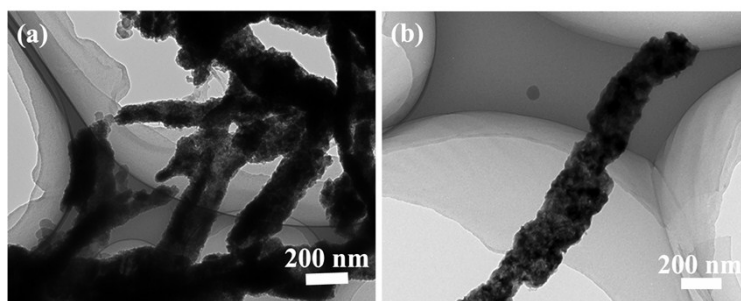

Fig. S8 (a, b) The TEM images of C&N co-doped  $\text{Co}_3\text{O}_4$  HNFs after 60 cycles.

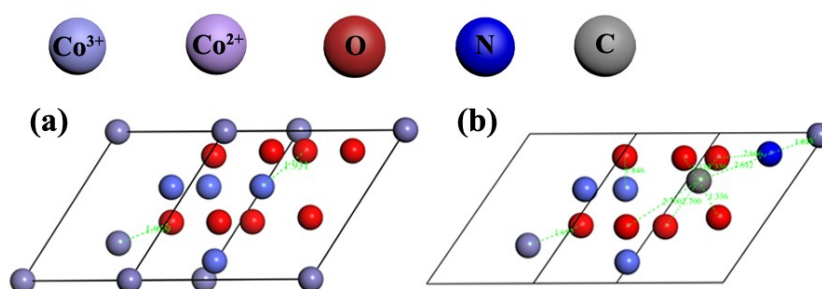

Fig. S9 Optimized structures (a, b) of  $\text{Co}_3\text{O}_4$  and C&N co-doped  $\text{Co}_3\text{O}_4$ .

The Face-centered-cubic (FCC) primitive cell of  $\text{Co}_3\text{O}_4$  is shown in Fig. S6, where  $\text{Co}^{3+}$  ions,  $\text{Co}^{2+}$  ions,  $\text{O}^{2-}$  ions, C and N are indicated by blueviolet, violet, red, gray and navy balls, respectively. The bond distances of  $\text{Co}^{2+}\text{-O}^{2-}$  (1.95 Å) and  $\text{Co}^{3+}\text{-O}^{2-}$  (1.93 Å) by PBE+U are overestimated by about 1% compared with experiment and as also found in other GGA+U studies.<sup>4</sup> Based on our Raman spectra and XPS results, one  $\text{Co}^{3+}$  and  $\text{O}^{2-}$  ions can be displaced by carbon and nitrogen. The optimized C&N co-doped  $\text{Co}_3\text{O}_4$  structure is shown in Fig. S6b.

1. (a) G. Kresse, J. Hafner, *Phys. Rev. B* 1993, 47, 558–561, (b) G. Kresse, J. Furthmüller, *Phys. Rev. B* 1996, 54, 11169–11186.
2. J. P. Perdew, K. Burke, M. Ernzerhof, *Phys. Rev. Lett.* 1996, 77, 3865–3868.
3. V. Singh, M. Kosa, K. Majhi, D. Thomas Major, *J. Chem. Theory Comput.* 2015, 11, 64–72.
4. J. Chen, X. F. Wu, A. Selloni, *Phys. Rev. B* 2011, 83, 245204.
